# Supplementary material for: Laser-induced immobilization of an amorphous iron-phosphate/Fe3O4 composite on nickel foam for efficient water oxidation
Source: Royal Society of Chemistry journal article supplement (doi:10.1039/d3cc04070d), 2023-01-01
Supplement: d3cc04070d1.pdf [file d3cc04070d1.pdf]

## Supplementary information

Laser-induced immobilization of amorphous iron-phosphate/ $\text{Fe}_3\text{O}_4$   
composite on nickel foam for efficient water oxidation

Yan Zou,<sup>a</sup> Man Jin,<sup>a</sup> Dongdong Zhu,<sup>a</sup> and Yu-Jia Tang<sup>\*a</sup>

<sup>a</sup> School of Chemistry and Materials Science, Institute of Advanced Materials and Flexible Electronics (IAMFE), Nanjing University of Information Science and Technology, 219 Ningliu Road, Nanjing, 210044, China

Email: tangyujia@nuist.edu.cn

## **Experimental section**

### **S1. Chemicals and materials**

Iron (III) nitrate nonahydrate ( $\text{Fe}(\text{NO}_3)_3 \cdot 9\text{H}_2\text{O}$ ,  $\geq 98\%$ ), cobalt nitrate hexahydrate ( $\text{Co}(\text{NO}_3)_2 \cdot 6\text{H}_2\text{O}$ ), ammonium dihydrogen phosphate ( $\text{NH}_4\text{H}_2\text{PO}_4$ ), and ethanol (EtOH) were purchased from Sinopharm Chemical Reagent Co. Ltd. Nickel nitrate hexahydrate ( $\text{Ni}(\text{NO}_3)_2 \cdot 6\text{H}_2\text{O}$ ) was purchased from Aladdin. Nickel foam was purchased from Kunshan Jiayisheng Electronics Co., Ltd.

### **S2. Physical characterizations**

Surface morphology was observed using a Gemini SEM 300 field emission scanning electron microscope (FESEM) at an accelerating voltage of 5 kV. Transmission electron microscopy (TEM) and high-resolution TEM (HRTEM) images were obtained by an FEI Tecnai G2 F30 S-Twin type electron microscope operating at 300 kV. Elemental analyses and energy dispersive X-ray (EDX) analyses were performed using an X-max Oxford detector at an accelerating voltage of 15 kV. X-ray photoelectron spectroscopy (XPS) was performed with Al  $K\alpha$  radiation on a scanning X-ray microprobe (Thermo Fisher Scientific Escalab Xi+). Powder X-ray diffractometer (XRD) data were collected with a Smart Lab/3kW using Cu  $K\alpha$  radiation.

### **S3. Synthesis of L-FePO on NF**

30 mg of  $\text{Fe}(\text{NO}_3)_3 \cdot 9\text{H}_2\text{O}$ , 40 mg of  $\text{NH}_4\text{H}_2\text{PO}_4$ , 0.5 mL of EtOH, and 0.5 mL of DI water were mixed and ultrasonicated for 1 h to prepare the FeHP precursor. 0.2 mL of the above suspension was coated on both sides of a NF substrate with a size of  $1 \times 2 \text{ cm}^2$ . The coating area was  $1 \times 1 \text{ cm}^2$ . After drying at  $60 \text{ }^\circ\text{C}$  for 20 min, the FeHP precursor on NF was laser-irradiated using a laser machine (JL-K6040, Liaocheng Julong Laser Equipment Co., Ltd.) equipped with a focused  $10.6 \text{ }\mu\text{m}$   $\text{CO}_2$  laser. The laser speed and power were set to  $10 \text{ mm s}^{-1}$  and 8 W, respectively. After the laser-induced irradiation treatment, the L-FePO composite immobilized on NF was successfully obtained. For comparison, the control samples of L-CoPO and L-NiPO on NF were prepared by laser-irradiating  $\text{Co}(\text{NO}_3)_2 \cdot 6\text{H}_2\text{O}/\text{NH}_4\text{H}_2\text{PO}_4$  and

$\text{Ni}(\text{NO}_3)_2 \cdot 6\text{H}_2\text{O}/\text{NH}_4\text{H}_2\text{PO}_4$  mixture precursors, respectively.

#### **S4. Electrochemical measurements**

Electrochemical measurements were performed at room temperature using a three-electrode system on an electrochemical workstation (CHI Instruments 660E, China). The L-FePO composite on NF was directly used as a working electrode with a size of  $1 \times 2 \text{ cm}^2$  and a measurement area of  $1 \times 1 \text{ cm}^2$ . A Hg/HgO electrode and a graphite rod were used as reference and counter electrodes, respectively. A 1.0 M KOH solution was used as an electrolyte. The OER performance was evaluated by linear scanning voltammetry (LSV) curves at a scan rate of  $5 \text{ mV s}^{-1}$ . Tafel plots were calculated from the corresponding LSV curves. Tafel slope was calculated as follows:  $\eta = a + b \log j$ , where  $\eta$ ,  $a$ ,  $b$ , and  $j$  refer to overpotential, Tafel constant, Tafel slope, and current density, respectively. Chronopotentiometric (CP) curve was recorded for 100 h at a constant current density of  $100 \text{ mA cm}^{-2}$ . All the LSV and CP curves were used after 90% iR compensation. Cyclic voltammetry (CV) curves were acquired in a potential range of 0-1 V vs. Hg/HgO at different scan rates (10, 20, 40, 60, 80, and  $100 \text{ mV s}^{-1}$ ) to evaluate the double layer capacitance ( $C_{dl}$ ) values. Electrochemical impedance spectroscopy (EIS) was measured at an overpotential of 300 mV from 100000 to 0.01 Hz with an amplitude of 10 mV.

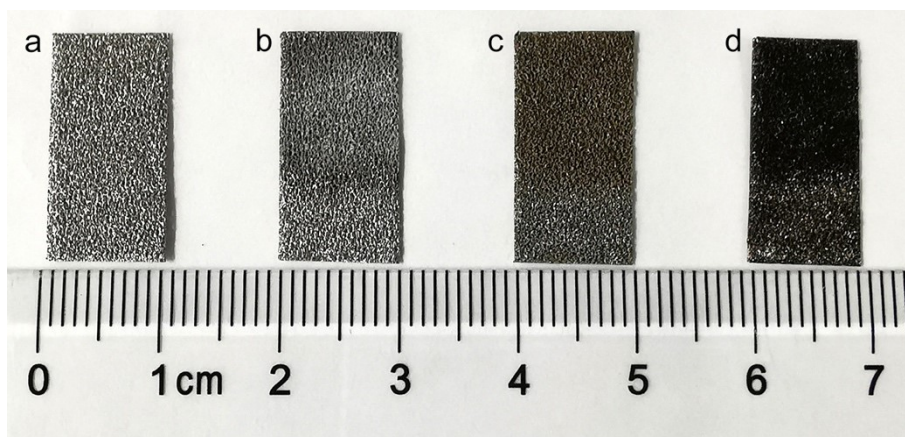

**Figure S1.** Photos of (a) NF, (b) FeHP precursor on NF, (c) L-FePO on NF, and (d) L-FePO on NF after the stability test for OER.

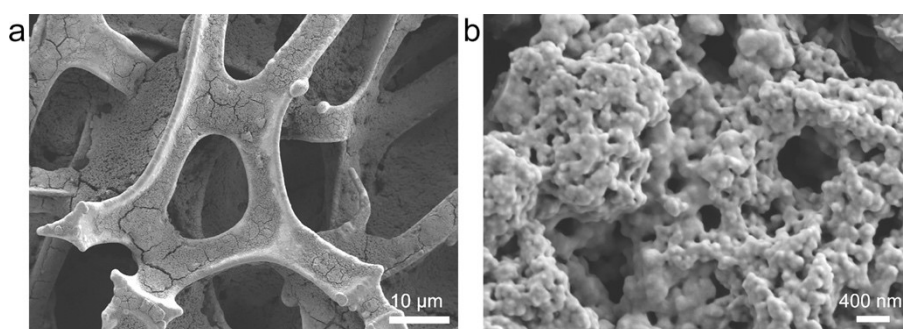

**Figure S2.** SEM images of the FeHP precursor loaded on NF prepared by the mixture of  $\text{Fe}(\text{NO}_3)_3 \cdot 9\text{H}_2\text{O}$  and  $\text{NH}_4\text{H}_2\text{PO}_4$ .

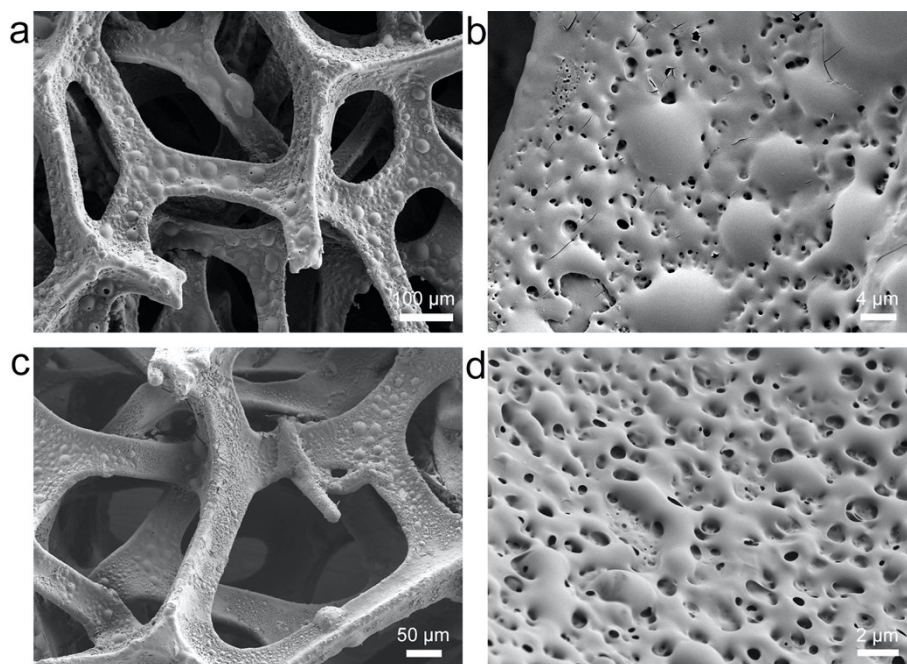

**Figure S3.** Low and high-magnification SEM images of L-MPO on NF: (a, b) L-CoPO, and (c, d) L-NiPO.

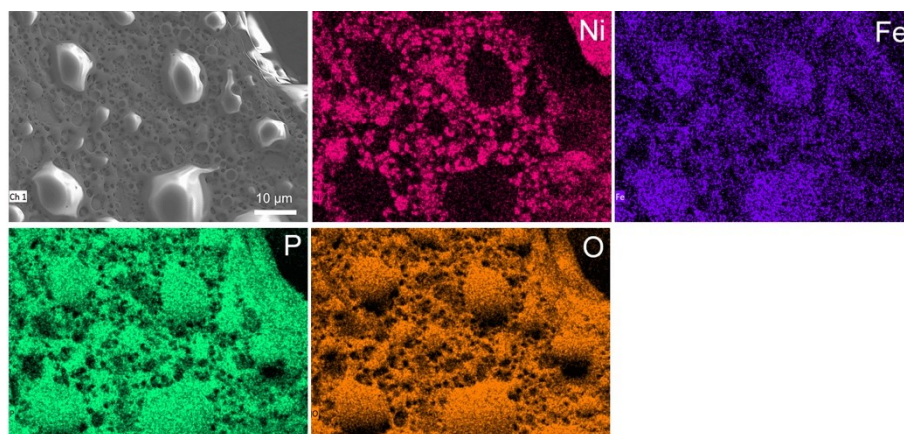

**Figure S4.** Elemental mapping images of corresponding elements of Ni, Fe, P, and O in L-FePO on NF.

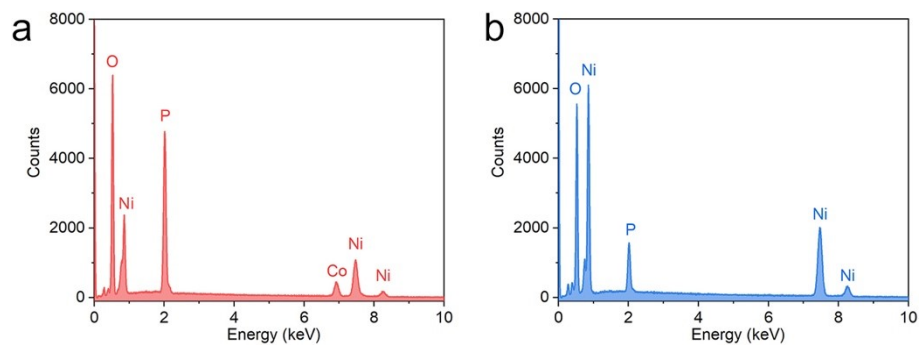

**Figure S5.** EDX spectra of (a) L-CoPO and (b) L-NiPO.

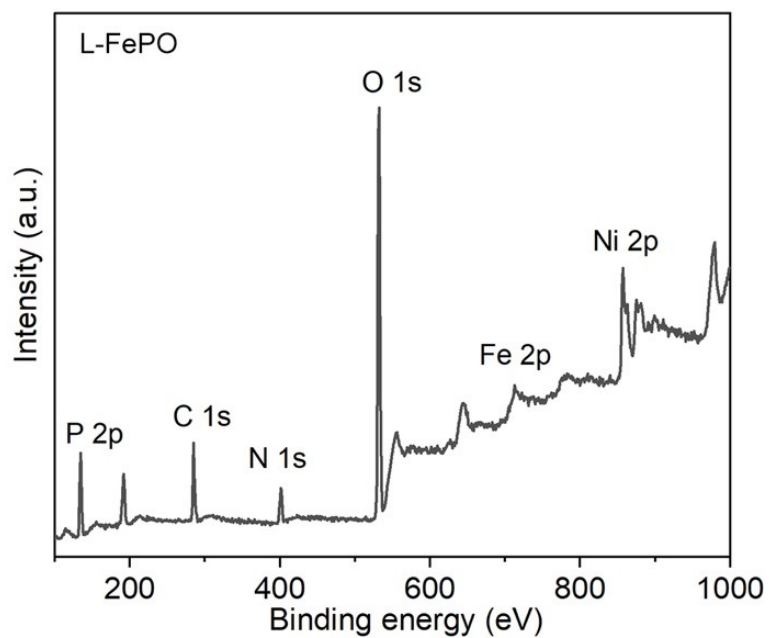

**Figure S6.** Full XPS spectrum of L-FePO on NF.

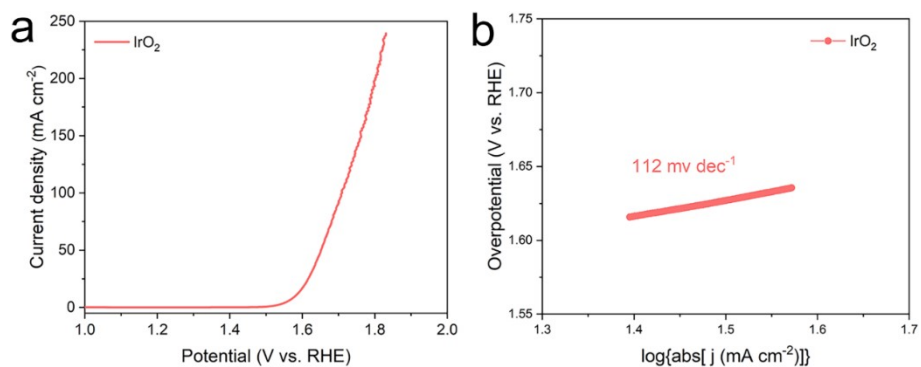

**Figure S7.** (a) LSV curve and (b) Tafel plot of the commercial IrO<sub>2</sub> catalyst for OER in an alkaline medium.

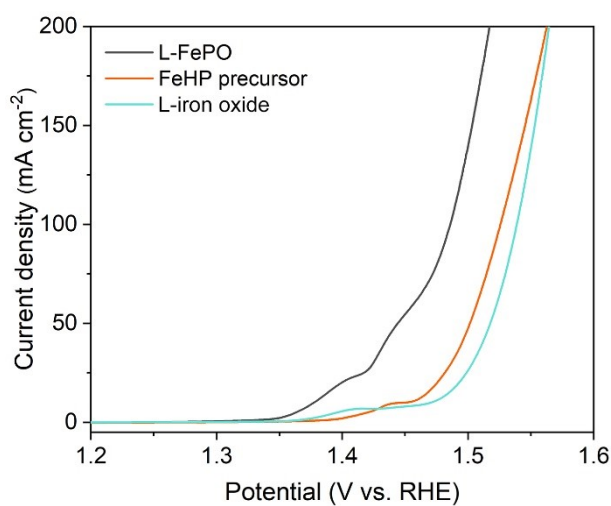

**Figure S8.** LSV curves of L-FePO, the FeHP precursor prepared using Fe(NO<sub>3</sub>)<sub>3</sub>/NH<sub>4</sub>H<sub>2</sub>PO<sub>4</sub> mixture, and L-iron oxide prepared by the direct laser-induced treatment of Fe(NO<sub>3</sub>)<sub>3</sub> coated on NF.

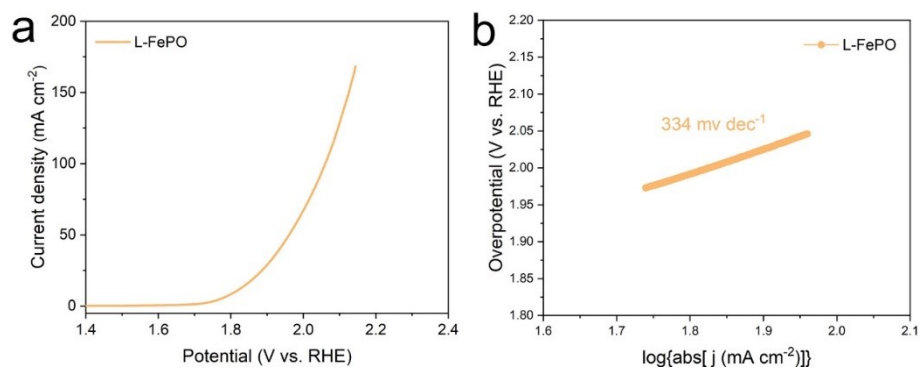

**Figure S9.** (a) LSV curve and (b) Tafel plot L-FePO on NF measured in 1.0 M PBS.

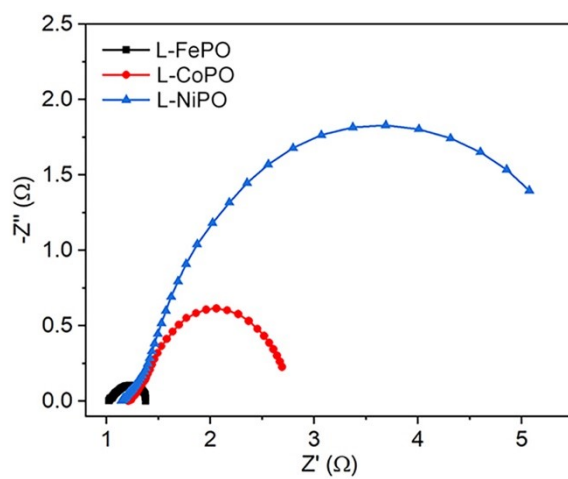

**Figure S10.** EIS spectra of L-FePO, L-CoPO, and L-NiPO on NF.



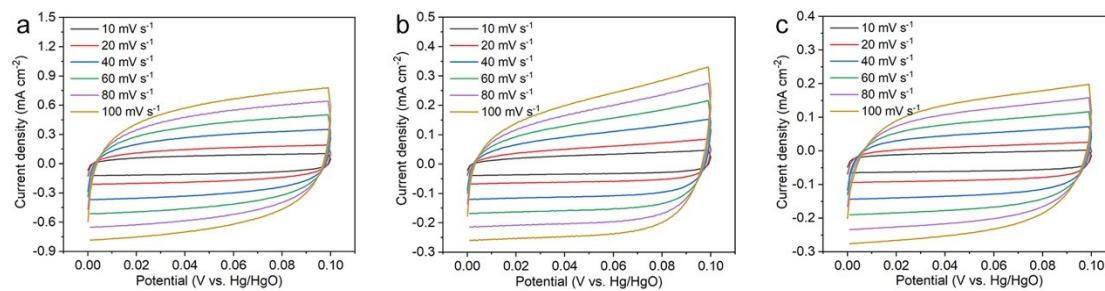

**Figure S11.** CV curves of (a) L-FePO, (b) L-CoPO, and (c) L-NiPO on NF measured in a non-faradic region of 0-0.1 V vs. Hg/HgO at different scan rates (10-100 mV s<sup>-1</sup>).

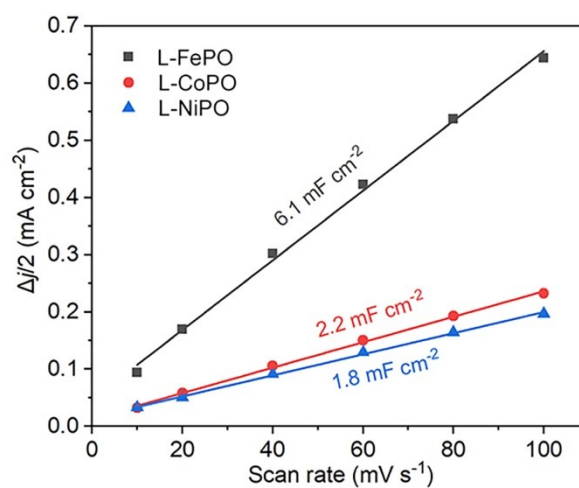

**Figure S12.**  $C_{dl}$  plots of L-FePO, L-CoPO, and L-NiPO on NF.

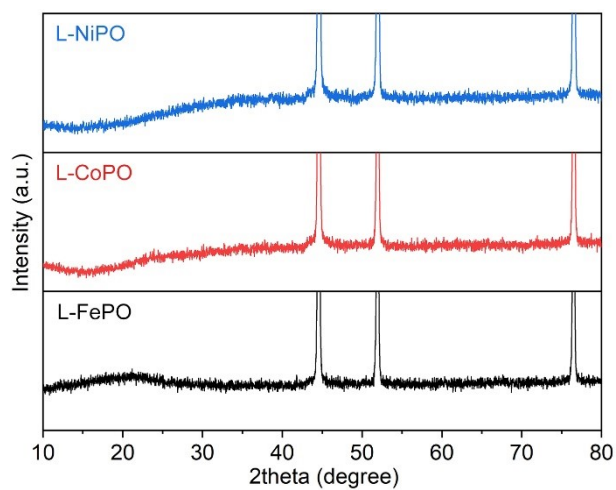

**Figure S13.** XRD patterns of L-MPO on NF after the stability test for OER

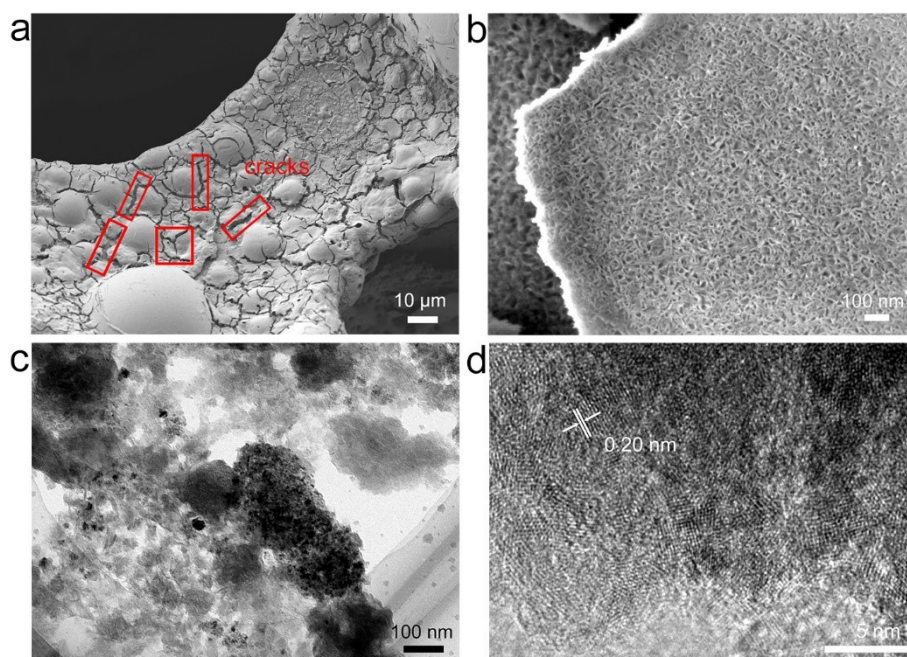

**Figure S14.** (a, b) SEM, (c) TEM, and (d) HRTEM images of L-FePO after the stability test for OER.

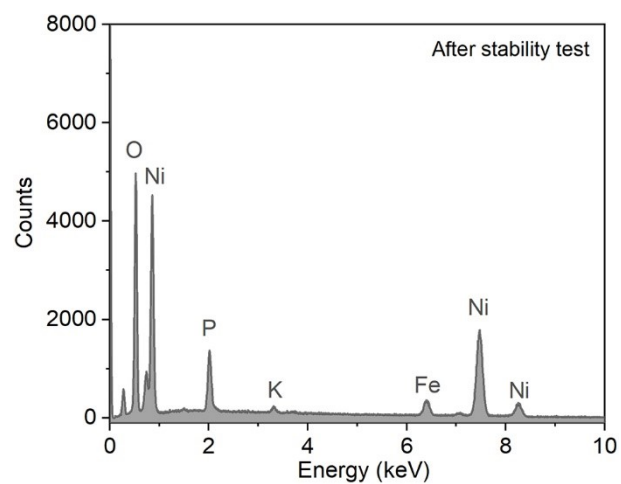

**Figure S15.** EDX spectra of L-FePO on NF after the stability test for OER in 1.0 M KOH.

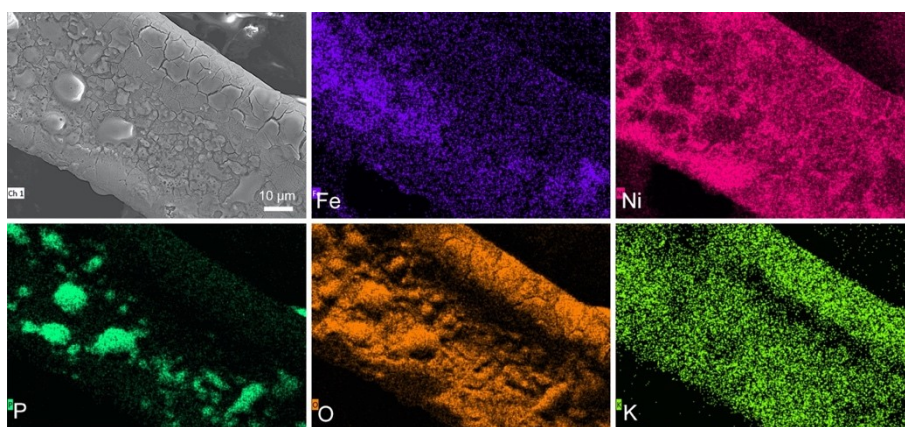

**Figure S16.** Elemental mapping images of L-FePO on NF after the stability test for OER.

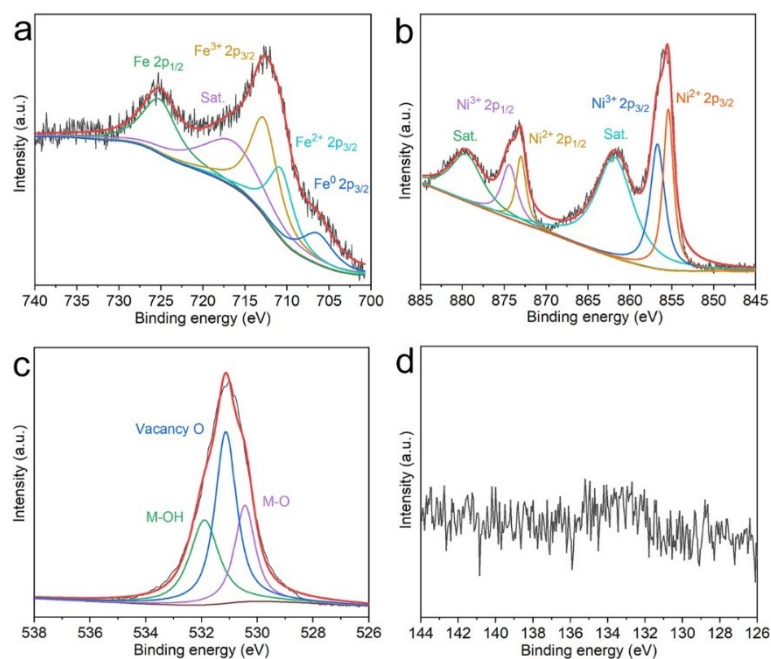

**Figure S17.** High-resolution XPS spectra of (a) Fe 2p, (b) Ni 2p, (c) O 1s, and (d) P 2p.

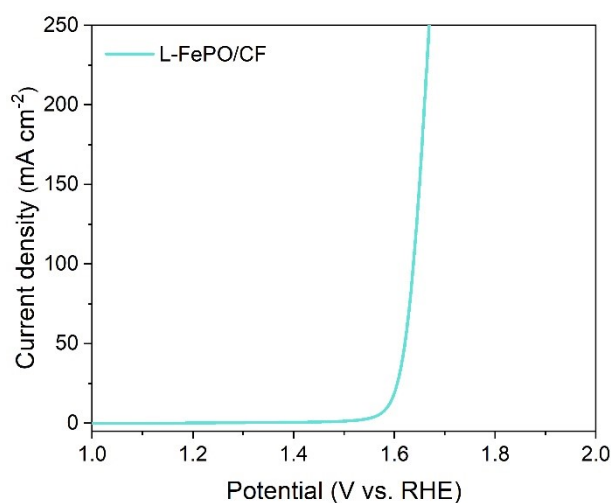

**Figure S18.** LSV curve of L-FePO laser-irradiated on Cu foam for OER in 1 M KOH.

The L-FePO composite laser-irradiated on the Cu foam (CF) substrate was applied to investigate the influence of Ni-doping originating from the NF support. The LSV curves show that the  $\eta_{100}$  value of L-FePO on CF was 408 mV, which was higher than that of L-FePO on NF, suggesting its poor OER activity. Therefore, the Ni sources doped into L-FePO and the conductive NF support could enhance the electrocatalytic activity to some extent.

**Table S1.** OER comparison of L-MPO on NF and recently reported phosphate- and oxide-based electrocatalysts.

| Electrocatalyst                                                       | Support          | Electrolyte | Overpotential                    | Tafel slope (mV dec <sup>-1</sup> ) | Reference |
|-----------------------------------------------------------------------|------------------|-------------|----------------------------------|-------------------------------------|-----------|
| L-FePO                                                                | Ni foam          | 1 M KOH     | 256 mV @ 100 mA cm <sup>-2</sup> | 71                                  | This work |
| P-CoPc@CNT                                                            | GCE <sup>a</sup> | 1 M KOH     | 300 mV @ 10 mA cm <sup>-2</sup>  | 41.7                                | 1         |
| 2D-CoHPi                                                              | GCE              | 1 M KOH     | 314 mV @ 10 mA cm <sup>-2</sup>  | 31                                  | 2         |
| NiCo-LDH/NiCoPi                                                       | Ni foam          | 1 M KOH     | 300 mV @ 100 mA cm <sup>-2</sup> | 73                                  | 3         |
| CoFeNiMnMoPi(H EPI)                                                   | GCE              | 1 M KOH     | 270 mV @ 10 mA cm <sup>-2</sup>  | 74                                  | 4         |
| Fe <sub>x</sub> Ni <sub>2-x</sub> P <sub>4</sub> O <sub>12</sub> /RGO | GCE              | 1 M KOH     | 270 mV @ 10 mA cm <sup>-2</sup>  | 43.8                                | 5         |
| N-NiMoO <sub>4</sub> /Ni/CNTs                                         | GCE              | 1 M KOH     | 330 mV @ 10 mA cm <sup>-2</sup>  | 89.5                                | 6         |
| Fe-Co-O/Co@NC-mNS/NF                                                  | Ni foam          | 1 M KOH     | 257 mV @ 10 mA cm <sup>-2</sup>  | 41.56                               | 7         |
| Co, S-Fe <sub>3</sub> O <sub>4</sub> /IF                              | Ni foam          | 1 M KOH     | 356 mV @ 10 mA cm <sup>-2</sup>  | 50.9                                | 8         |
| Co <sub>3</sub> O <sub>4</sub> nanomeshes                             | GCE              | 1 M KOH     | 307 mV @ 10 mA cm <sup>-2</sup>  | 76                                  | 9         |
| NiO <sub>x</sub> -NiSe <sub>2</sub>                                   | GCE              | 1 M KOH     | 266 mV @ 10 mA cm <sup>-2</sup>  | 53.4                                | 10        |

Note: a) GCE denotes glassy carbon electrode.

## Reference

- 1 Y. Liu, S. Zhang, C. Jiao, H. Chen, G. Wang, W. Wu, Z. Zhuo and J. Mao, *Adv. Sci.*, 2023, **10**, 2206107.
- 2 J. Wang and H. C. Zeng, *ACS Appl. Mater. Interfaces*, 2018, **10**, 6288-6298.
- 3 S. Zhou, Y. Liu, J. Li, Z. Liu, J. Shi, L. Fan and W. Cai, *Green Energy Environ.*, 2022, doi: <https://doi.org/10.1016/j.gee.2022.12.003>.
- 4 H. Qiao, X. Wang, Q. Dong, H. Zheng, G. Chen, M. Hong, C.-P. Yang, M. Wu, K. He and L. Hu, *Nano Energy*, 2021, **86**, 106029.

- 5 L. Lin, Y. Wang, Q. Ye, Y. Zhao and Y. Cheng, *Appl. Catal., B*, 2023, **334**, 122834.
- 6 G.-L. Li, X.-Y. Qiao, Y.-Y. Miao, T.-Y. Wang and F. Deng, *Small*, 2023, **19**, 2207196.
- 7 T. I. Singh, G. Rajeshkhanna, U. N. Pan, T. Kshetri, H. Lin, N. H. Kim and J. H. Lee, *Small*, 2021, **17**, 2101312.
- 8 H.-J. Liu, S. Zhang, Y.-N. Zhou, W.-L. Yu, Y. Ma, S.-T. Wang, Y.-M. Chai and B. Dong, *Small*, 2023, **19**, 2301255.
- 9 Y. Li, F.-M. Li, X.-Y. Meng, S.-N. Li, J.-H. Zeng and Y. Chen, *ACS Catal.*, 2018, **8**, 1913-1920.
- 10 H. Li, S. Chen, H. Lin, X. Xu, H. Yang, L. Song and X. Wang, *Small*, 2017, **13**, 1701487.
